# Supplementary material for: Association of CRISPR-Cas Systems with Antimicrobial Resistance and MLST Types in Neonatal Invasive Escherichia coli
Source: Research Square preprint supplement (doi:10.21203/rs.3.rs-8280865/v1), 2026-02-04
Supplement: Supplementary file 1 [file 33f103d1e272615d11f1edde.docx]

Table S1 Summary of genome data and CNCB accession numbers of neonatal *E. coli* isolates

| Isolates ID | BioSample Accession | Genome Accession | Status |
| --- | --- | --- | --- |
| EXPEC001 | SAMC5880565 | GWHGQAP00000000.1 | Deposited |
| EXPEC002 | SAMC5880566 | GWHGQDG00000000.1 | Deposited |
| EXPEC003 | SAMC5880567 | GWHGQDH00000000.1 | Deposited |
| EXPEC004 | SAMC5880568 | GWHGQDI00000000.1 | Deposited |
| EXPEC005 | SAMC5880569 | GWHGQDJ00000000.1 | Deposited |
| EXPEC006 | SAMC5880570 | GWHGQDK00000000.1 | Deposited |
| EXPEC007 | SAMC5880571 | GWHGQDL00000000.1 | Deposited |
| EXPEC008 | SAMC5880572 | GWHGQDM00000000.1 | Deposited |
| EXPEC009 | SAMC5880573 | GWHGQDN00000000.1 | Deposited |
| EXPEC010 | SAMC5880574 | GWHGQDO00000000.1 | Deposited |
| EXPEC011 | SAMC5880575 | GWHGQDP00000000.1 | Deposited |
| EXPEC012 | SAMC5880576 | GWHGQDQ00000000.1 | Deposited |
| EXPEC013 | SAMC5880577 | GWHGQDR00000000.1 | Deposited |
| EXPEC014 | SAMC5880578 | GWHGQDS00000000.1 | Deposited |
| EXPEC015 | SAMC5880579 | GWHGQDT00000000.1 | Deposited |
| EXPEC016 | SAMC5880580 | GWHGQDU00000000.1 | Deposited |
| EXPEC017 | SAMC5880581 | GWHGQDV00000000.1 | Deposited |
| EXPEC018 | SAMC5880582 | GWHGQDW00000000.1 | Deposited |
| ExPEC019 | SAMC5880583 | GWHGQDX00000000.1 | Deposited |
| EXPEC020 | SAMC5880584 | GWHGQDY00000000.1 | Deposited |
| EXPEC021 | SAMC5880585 | GWHGQDZ00000000.1 | Deposited |
| EXPEC022 | SAMC5880586 | GWHGQEA00000000.1 | Deposited |
| EXPEC023 | SAMC5880587 | GWHGQEB00000000.1 | Deposited |
| EXPEC024 | SAMC5880588 | GWHGQEC00000000.1 | Deposited |
| EXPEC025 | SAMC5880589 | GWHGQED00000000.1 | Deposited |
| EXPEC026 | SAMC5880590 | GWHGQEE00000000.1 | Deposited |
| EXPEC028 | SAMC5880591 | GWHGQEF00000000.1 | Deposited |
| EXPEC029 | SAMC5880592 | GWHGQEG00000000.1 | Deposited |
| EXPEC030 | SAMC5880593 | GWHGQEH00000000.1 | Deposited |
| EXPEC031 | SAMC5880594 | GWHGQEI00000000.1 | Deposited |
| EXPEC032 | SAMC5880595 | GWHGQEJ01000000 | Deposited |
| EXPEC033 | SAMC5880596 | GWHGQEK00000000.1 | Deposited |
| EXPEC034 | SAMC5880597 | GWHGQEL00000000.1 | Deposited |
| EXPEC035 | SAMC5880598 | GWHGQEM00000000.1 | Deposited |
| EXPEC036 | SAMC5880599 | GWHGQEN00000000.1 | Deposited |
| EXPEC037 | SAMC5880600 | GWHGQEO00000000.1 | Deposited |
| EXPEC038 | SAMC5880601 | GWHGQEP00000000.1 | Deposited |
| EXPEC039 | SAMC5880602 | GWHGQEQ00000000.1 | Deposited |
| EXPEC040 | SAMC5880603 | GWHGQER00000000.1 | Deposited |
| EXPEC041 | SAMC5880604 | GWHGQES00000000.1 | Deposited |
| EXPEC042 | SAMC5880605 | GWHGQET00000000.1 | Deposited |
| EXPEC043 | SAMC5880606 | GWHGQEU00000000.1 | Deposited |
| EXPEC044 | SAMC5880607 | GWHGQEV00000000.1 | Deposited |
| EXPEC045 | SAMC5880608 | GWHGQEW00000000.1 | Deposited |
| EXPEC046 | SAMC5880609 | GWHGQEX00000000.1 | Deposited |
| EXPEC047 | SAMC5880610 | GWHGQEY00000000.1 | Deposited |
| EXPEC048 | SAMC5880611 | GWHGQEZ00000000.1 | Deposited |
| EXPEC049 | SAMC5880612 | GWHGQFA00000000.1 | Deposited |
| EXPEC050 | SAMC5880613 | GWHGQFB00000000.1 | Deposited |
| EXPEC051 | SAMC5880614 | GWHGQFC00000000.1 | Deposited |
| EXPEC052 | SAMC5880615 | GWHGQFD00000000.1 | Deposited |
| EXPEC053 | SAMC5880616 | GWHGQFE00000000.1 | Deposited |
| EXPEC054 | SAMC5880617 | GWHGQFF00000000.1 | Deposited |
| EXPEC055 | SAMC5880618 | GWHGQFG00000000.1 | Deposited |
| EXPEC056 | SAMC5880619 | GWHGQFH00000000.1 | Deposited |
| EXPEC057 | SAMC5880620 | GWHGQFI00000000.1 | Deposited |
| EXPEC058 | SAMC5880621 | GWHGQFJ00000000.1 | Deposited |
| EXPEC059 | SAMC5880622 | GWHGQFK00000000.1 | Deposited |
| EXPEC060 | SAMC5880623 | GWHGQFL00000000.1 | Deposited |
| EXPEC061 | SAMC5880624 | GWHGQFM00000000.1 | Deposited |
| EXPEC062 | SAMC5880625 | GWHGQFN00000000.1 | Deposited |
| EXPEC063 | SAMC5880626 | GWHGQFO00000000.1 | Deposited |
| EXPEC064 | SAMC5880627 | GWHGQFP00000000.1 | Deposited |
| EXPEC065 | SAMC5880628 | GWHGQFQ00000000.1 | Deposited |
| EXPEC066 | SAMC5880629 | GWHGQFR00000000.1 | Deposited |

* Draft genomes of all *E. coli* isolates in this study have been submitted to CNCB under BioProject accession number PRJCA046074. All genomes have been deposited, and the accession numbers are listed in the table. They are now searchable, and the sequences will be released immediately upon publication of the article.
